# Supplementary material
Source: PubMed Central journal article supplement (PMC3637917)
Supplement: NIHMS456150-supplement-Gels.pdf [file NIHMS456150-supplement-Gels.pdf]

A

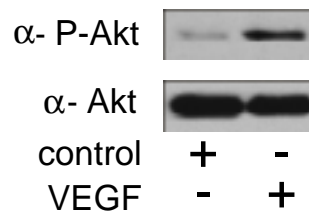

B

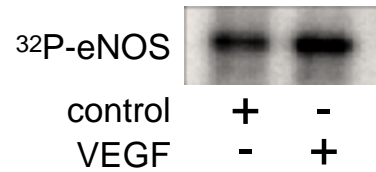

C

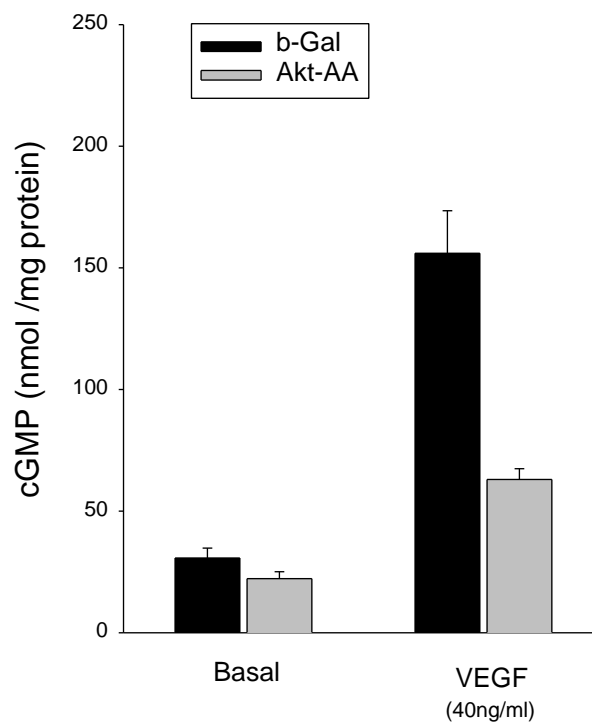

In A, VEGF stimulates phosphorylation of Akt in human endothelial cells (HUVEC). In B, VEGF stimulates eNOS phosphorylation. In C, VEGF-induced NO release from HUVEC is mediated via an Akt-dependent mechanism. HUVEC were serum starved followed by agonist treatment for 15 minutes. cGMP was used as a bioassay for NO production.
